# Supplementary material for: Initial evaluation of thyroid dysfunction - Are simultaneous TSH and fT4 tests necessary?
Source: PubMed Central journal article supplement (PMC5927436; doi:10.1371/journal.pone.0196631), 2018-04-30
Supplement: pone.0196631.s003.pdf [file pone.0196631.s003.pdf]

S1 Table. Prevalence of Overt Dysfunction within eu-, hypo-, and hyperthyroid groups

|                   | TSH, mU/L        |          |                   |
|-------------------|------------------|----------|-------------------|
|                   | < 0.45           | 0.45-4.5 | >4.5              |
| N = 4471          | 193              | 4156     | 121               |
| Overt Dysfunction | <b>11.9%(23)</b> | -        | <b>27.3% (33)</b> |

Abbreviations: Thyroid-Stimulating Hormone (TSH)
