# Supplementary material for: Initial evaluation of thyroid dysfunction - Are simultaneous TSH and fT4 tests necessary?
Source: PubMed Central journal article supplement (PMC5927436; doi:10.1371/journal.pone.0196631), 2018-04-30
Supplement: pone.0196631.s004.pdf [file pone.0196631.s004.pdf]

S2 Table. Univariate analysis of potential predictors of hypothyroidism.

| Characteristic               | Entire cohort | Hypothyroid State | Univariate analysis |            | P Value  |
|------------------------------|---------------|-------------------|---------------------|------------|----------|
|                              |               |                   | Euthyroid State     | other      |          |
| Age                          |               |                   |                     |            |          |
| <50                          | 2286          | 1.4% (31)         | 94.1% (2152)        | 4.5% (103) | < 0.001  |
| 50-75                        | 1767          | 3.8% (67)         | 92.0% (1626)        | 4.2% (74)  |          |
| >75                          | 418           | 5.5% (23)         | 90.4% (378)         | 4.1% (17)  |          |
| Sex                          |               |                   |                     |            |          |
| female                       | 2468          | 1.9% (38)         | 93.8% (1878)        | 4.3% (87)  | 0.0023   |
| male                         | 2003          | 3.4% (83)         | 92.3% (2278)        | 4.3% (107) |          |
| Weight                       |               |                   |                     |            |          |
| 1st quantile                 | 2157          | 2.7% (58)         | 92.8% (2002)        | 4.5% (97)  | 0.7961   |
| 2nd quantile                 | 2192          | 2.8% (62)         | 93.1% (2040)        | 4.1% (90)  |          |
| Missing                      | 122           | 0.8% (1)          | 93.4% (114)         | 5.7% (7)   |          |
| Height                       |               |                   |                     |            |          |
| 1st quantile                 | 2273          | 3.4% (78)         | 92.4% (2100)        | 4.2% (95)  | 0.015    |
| 2nd quantile                 | 2080          | 2.0% (42)         | 93.6% (1946)        | 4.4% (92)  |          |
| missing                      | 118           | 0.8% (1)          | 93.2% (110)         | 5.9% (7)   |          |
| BMI                          |               |                   |                     |            |          |
| <20                          | 3429          | 2.5% (84)         | 93.1% (3194)        | 4.4% (151) | 0.0369   |
| 20-30                        | 201           | 3.0% (6)          | 94.0% (189)         | 3.0% (6)   |          |
| >30                          | 717           | 4.2% (30)         | 91.6% (657)         | 4.2% (30)  |          |
| missing                      | 124           | 0.8% (1)          | 93.5% (116)         | 5.7% (7)   |          |
| Smoking                      |               |                   |                     |            |          |
| Never, Past                  | 3681          | 2.9% (105)        | 93.2% (3429)        | 4.0% (147) | 0.1288   |
| Current                      | 570           | 1.8% (10)         | 92.3% (526)         | 6.0% (34)  |          |
| missing                      | 220           | 2.7% (6)          | 91.4% (201)         | 5.9% (13)  |          |
| Alcohol                      |               |                   |                     |            |          |
| Never                        | 274           | 4.4% (12)         | 89.4% (245)         | 6.2% (17)  | 0.1121   |
| Past                         | 400           | 3.5% (14)         | 93.0% (372)         | 3.5% (14)  |          |
| Current                      | 3746          | 2.4% (92)         | 93.2% (3491)        | 4.4% (163) |          |
| missing                      | 51            | 5.9% (3)          | 94.1% (48)          | 0.0% (0)   |          |
| Thyroid affecting medication |               |                   |                     |            |          |
| No medication                | 4433          | 2.6% (118)        | 93.0% (4121)        | 4.4% (194) | 0.1182   |
| medication                   | 38            | 7.9% (3)          | 92.1% (35)          | 0.0% (0)   |          |
| Menopause                    |               |                   |                     |            |          |
| Premenopausal                | 1217          | 1.6% (19)         | 93.8% (1142)        | 4.6% (56)  | < 0.0001 |
| Postmenopausal               | 1251          | 5.1% (64)         | 90.8% (1136)        | 4.1% (51)  |          |
| missing or male              | 2003          | 1.9% (38)         | 93.8% (1878)        | 4.3% (87)  |          |
| Systolic Bloodpressure       |               |                   |                     |            |          |
| < 140                        | 3587          | 2.5% (91)         | 93.0% (3335)        | 4.5% (161) | 0.0785   |
| >= 140                       | 772           | 3.8% (29)         | 92.7% (716)         | 3.5% (27)  |          |
| missing                      | 112           | 0.9% (1)          | 93.8% (105)         | 5.3% (6)   |          |
| Diastolic Bloodpressure      |               |                   |                     |            |          |
| < 80                         | 3089          | 2.8% (88)         | 92.6% (2860)        | 4.6% (141) | 0.5157   |
| >= 80                        | 1269          | 2.5% (32)         | 93.8% (1190)        | 3.7% (47)  |          |
| missing                      | 113           | 0.9% (1)          | 93.8% (106)         | 5.3% (6)   |          |
| Diabetes Mellitus            |               |                   |                     |            |          |
| Negative                     | 4209          | 2.7% (112)        | 92.9% (3911)        | 4.4% (186) | 0.4944   |
| Positive                     | 262           | 3.4% (9)          | 93.5% (245)         | 3.1% (8)   |          |

Abbreviations: Body Mass Index (BMI)
