# Supplementary material for: Initial evaluation of thyroid dysfunction - Are simultaneous TSH and fT4 tests necessary?
Source: PubMed Central journal article supplement (PMC5927436; doi:10.1371/journal.pone.0196631), 2018-04-30
Supplement: pone.0196631.s005.pdf [file pone.0196631.s005.pdf]

S3 Table. Univariate analysis of potential predictors of hyperthyroidism.

| Characteristic               | Entire cohort | Hyperthyroid State | Univariate analysis |            | P Value       |
|------------------------------|---------------|--------------------|---------------------|------------|---------------|
|                              |               |                    | Euthyroid State     | other      |               |
| Age                          |               |                    |                     |            |               |
| <50                          | 2286          | 4.5% (103)         | 94.1% (2152)        | 1.4% (31)  | <b>0.6958</b> |
| 50-75                        | 1767          | 4.1% (73)          | 92.0% (1626)        | 3.9% (68)  |               |
| >75                          | 418           | 4.1% (17)          | 90.4% (378)         | 5.5% (23)  |               |
| Sex                          |               |                    |                     |            |               |
| female                       | 2003          | 4.3% (86)          | 93.8% (1878)        | 1.9% (39)  | <b>0.8639</b> |
| male                         | 2468          | 4.3% (107)         | 92.3% (2278)        | 3.4% (83)  |               |
| Weight                       |               |                    |                     |            |               |
| 1st quantile                 | 2157          | 4.5% (96)          | 92.8% (2002)        | 2.7% (59)  | <b>0.5785</b> |
| 2nd quantile                 | 2192          | 4.1% (90)          | 93.1% (2040)        | 2.8% (62)  |               |
| missing                      | 122           | 5.7% (7)           | 93.5% (114)         | 0.8% (1)   |               |
| Height                       |               |                    |                     |            |               |
| 1st quantile                 | 2273          | 4.2% (95)          | 92.4% (2100)        | 3.4% (78)  | <b>0.8252</b> |
| 2nd quantile                 | 2080          | 4.4% (91)          | 93.6% (1946)        | 2.0% (43)  |               |
| missing                      | 118           | 5.9% (7)           | 93.2% (110)         | 0.8% (1)   |               |
| BMI                          |               |                    |                     |            |               |
| <20                          | 3429          | 4.4% (150)         | 93.1% (3194)        | 2.5% (85)  | <b>0.7577</b> |
| 20-30                        | 201           | 3.0% (6)           | 94.0% (189)         | 3.0% (6)   |               |
| >30                          | 717           | 4.2% (30)          | 91.6% (657)         | 4.2% (30)  |               |
| missing                      | 124           | 5.7% (7)           | 93.5% (116)         | 0.8% (1)   |               |
| Smoking                      |               |                    |                     |            |               |
| Never, Past                  | 3681          | 4.0% (146)         | 93.2% (3429)        | 2.9% (106) | <b>0.0407</b> |
| Current                      | 570           | 6.0% (34)          | 92.3% (526)         | 1.7% (10)  |               |
| missing                      | 220           | 5.9% (13)          | 91.4% (201)         | 2.7% (6)   |               |
| Alcohol                      |               |                    |                     |            |               |
| Never                        | 274           | 6.2% (17)          | 89.4% (245)         | 4.4% (12)  | <b>0.3383</b> |
| Past                         | 400           | 3.5% (14)          | 93.0% (372)         | 3.5% (14)  |               |
| Current                      | 3746          | 4.3% (162)         | 93.2% (3491)        | 2.5% (93)  |               |
| missing                      | 51            | 0.0% (0)           | 94.1% (48)          | 5.9% (3)   |               |
| Thyroid affecting medication |               |                    |                     |            |               |
| No medication                | 4433          | 4.3% (193)         | 93.0% (4121)        | 2.7% (119) | <b>NA</b>     |
| medication                   | 38            | 0.0% (0)           | 92.1% (35)          | 7.9% (3)   |               |
| Menopause                    |               |                    |                     |            |               |
| Premenopausal                | 1217          | 4.6% (56)          | 93.8% (1142)        | 1.6% (19)  | <b>0.6557</b> |
| Postmenopausal               | 1251          | 4.1% (51)          | 90.8% (1136)        | 5.1% (64)  |               |
| missing or male              | 2003          | 4.3% (86)          | 93.8% (1878)        | 1.9% (39)  |               |
| Systolic blood pressure      |               |                    |                     |            |               |
| < 140                        | 3587          | 4.5% (160)         | 93.0% (3335)        | 2.5% (92)  | <b>0.2439</b> |
| >= 140                       | 772           | 3.5% (27)          | 92.7% (716)         | 3.8% (29)  |               |
| missing                      | 112           | 5.4% (6)           | 93.7% (105)         | 0.9% (1)   |               |
| Diastolic blood pressure     |               |                    |                     |            |               |
| < 80                         | 3089          | 4.5% (140)         | 92.6% (2860)        | 2.9% (89)  | <b>0.2051</b> |
| >= 80                        | 1269          | 3.7% (47)          | 93.8% (1190)        | 2.5% (32)  |               |
| missing                      | 113           | 5.3% (6)           | 93.8% (106)         | 0.9% (1)   |               |
| Diabetes mellitus            |               |                    |                     |            |               |
| Negative                     | 4209          | 4.4% (185)         | 92.9% (3911)        | 2.7% (113) | <b>0.2867</b> |
| Positive                     | 262           | 3.1% (8)           | 93.5% (245)         | 3.4% (9)   |               |

Abbreviations: Body Mass Index (BMI), Not applicable (NA)
