# Supplementary material for: Initial evaluation of thyroid dysfunction - Are simultaneous TSH and fT4 tests necessary?
Source: PubMed Central journal article supplement (PMC5927436; doi:10.1371/journal.pone.0196631), 2018-04-30
Supplement: pone.0196631.s006.pdf [file pone.0196631.s006.pdf]

S4 Table. Sensitivity and specificity at each score level.

| Score<br>Level | Sensitivity     |                 | Specificity       |            |
|----------------|-----------------|-----------------|-------------------|------------|
|                | Fraction (%)    | 95% CI          | Fraction (%)      | 95% CI     |
| > 0            | 121/121 (100%)  | 121/121 (100%)  | 0/4156 (0%)       | 0.0-0.1%   |
| > 1            | 113/121 (93.4%) | 113/121 (93.4%) | 796/4156 (19.2%)  | 18.0-20.4% |
| > 2            | 92/121 (76.0%)  | 92/121 (76.0%)  | 1966/4156 (47.3%) | 45.8-48.8% |
| > 3            | 76/121 (62.8%)  | 76/121 (62.8%)  | 2750/4156 (66.2%) | 64.7-67.6% |
| > 4            | 39/121 (32.2%)  | 39/121 (32.2%)  | 3584/4156 (86.2%) | 85.1-87.3% |
| > 5            | 18/121 (14.9%)  | 18/121 (14.9%)  | 3913/4156 (94.2%) | 93.4-94.8% |
| > 6            | 2/121 (1.7%)    | 2/121 (1.7%)    | 4112/4156 (98.9%) | 98.6-99.2% |
| > 7            | 0/121 (0%)      | 0/121 (0%)      | 4156/4156 (100%)  | 99.9-100%  |

| Prediction Score           |        |
|----------------------------|--------|
| Characteristic             | Points |
| Age 50-75 y                | 2      |
| Age ≥ 75 y                 | 4      |
| Women sex                  | 1      |
| BMI ≥ 30 kg/m <sup>2</sup> | 1      |

Abbreviations: Body Mass Index(BMI), Confidence Interval (CI), Years (y)
